# Supplementary material
Source: publisher figshare collection journal article supplement (https://acs.figshare.com/ndownloader/files/4075273)
Supplement: Supplementary file 1 [file 4075273]

## **Anion Exchange-Based Amperometric Assay for Heparin Using Polyimidazolium as Synthetic Receptor**

Hetong Qi, Li Zhang, Lifen Yang, Ping Yu,\* Lanqun Mao\*

*Beijing National Laboratory for Molecular Sciences, Key Laboratory of Analytical Chemistry for Living Biosystems, Institute of Chemistry, the Chinese Academy of Sciences (CAS), Beijing 100190, China*

### **Contents**

|                                                                               |                  |
|-------------------------------------------------------------------------------|------------------|
| NMR of [Vbim][Cl].....                                                        | <b>Figure S1</b> |
| NMR of Synthetic Pim.....                                                     | <b>Figure S2</b> |
| CVs of Pim/MCNTs-modified GC electrodes in PBS and $K_3Fe(CN)_6$ .....        | <b>Figure S3</b> |
| CVs of $Fe(CN)_6^{3-}$ /Pim/MCNTs-modified GC electrodes in PBS.....          | <b>Figure S4</b> |
| Investigation of the response time for anion-exchange.....                    | <b>Figure S5</b> |
| FT-IR Spectra for heparin and Pim aggregates exchanged by $K_3Fe(CN)_6$ ..... | <b>Figure S6</b> |

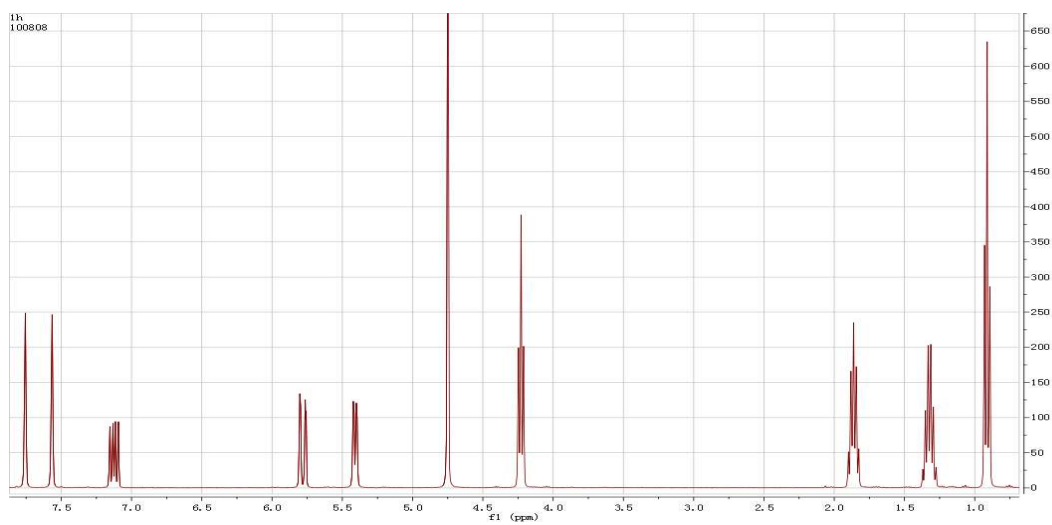

**Figure S1.** NMR data of [Vbim][Cl].

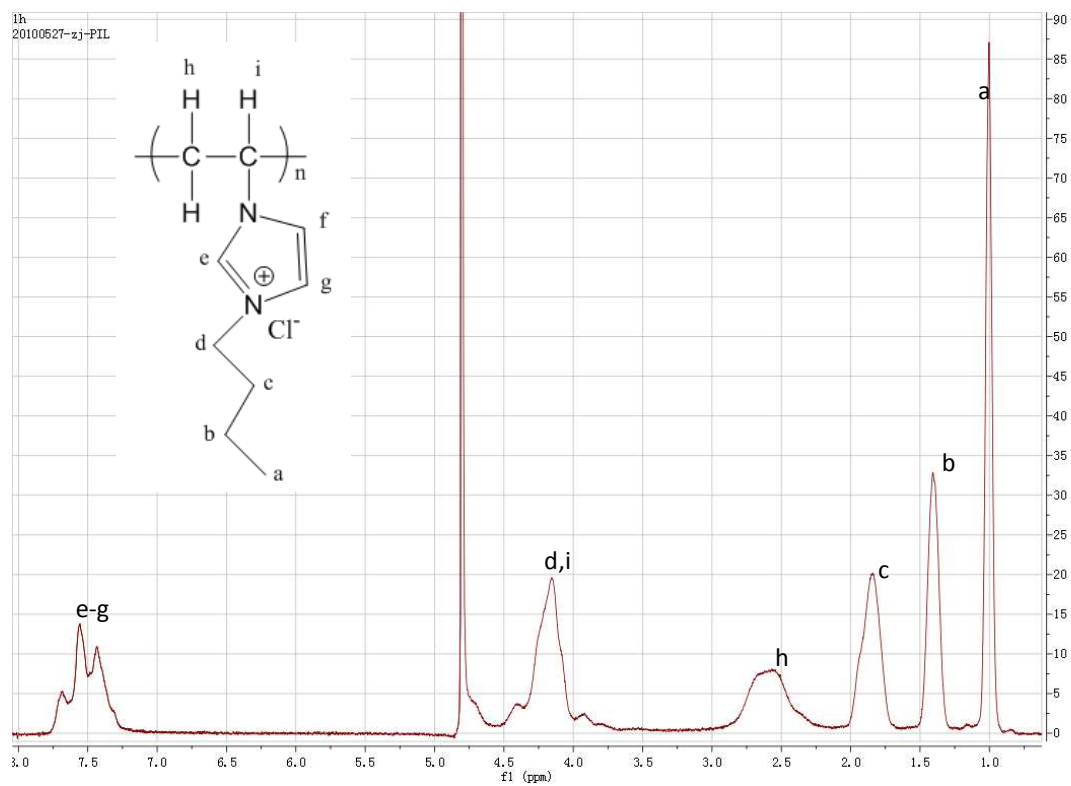

**Figure S2.** NMR of Synthetic Pim.

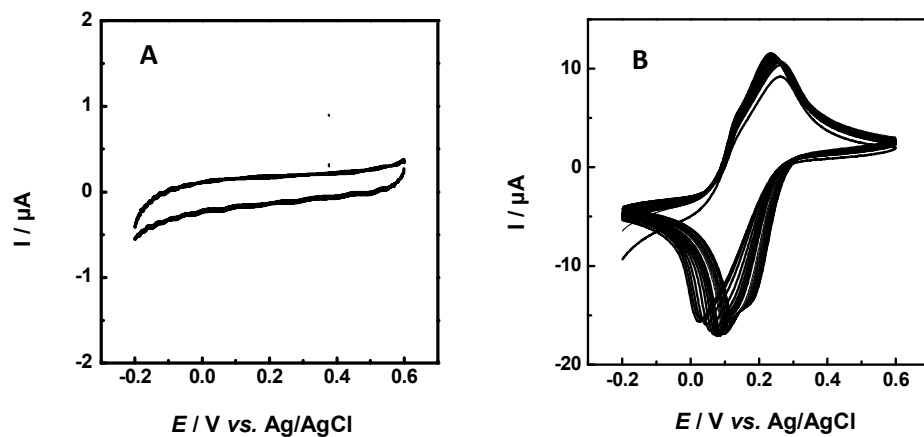

**Figure S3.** (A) CVs obtained at the Pim/MWCNT-modified GC electrodes in 0.10 M PBS (pH=7). (B) Consecutive CVs obtained at the Pim/MWCNT-modified GC electrodes in 1 mM  $K_3Fe(CN)_6$  for 60 cycles.

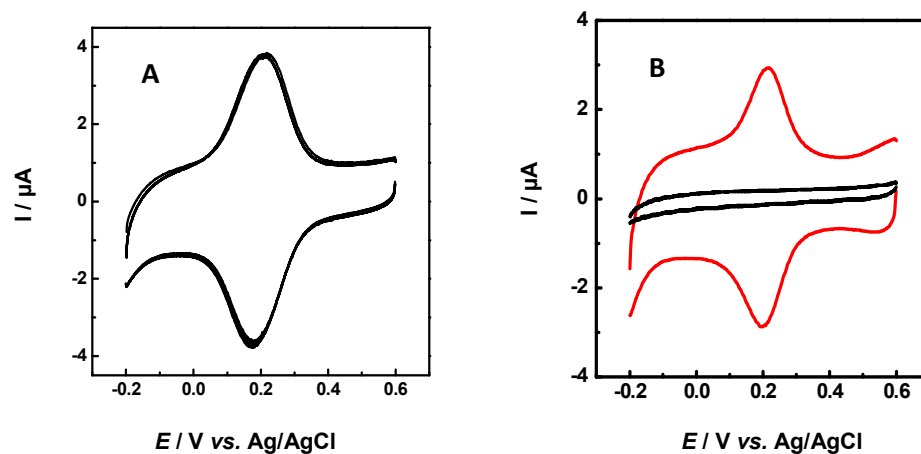

**Figure S4.** (A) CVs obtained at the  $Fe(CN)_6^{3-}$ /Pim/MWCNTs-modified GC electrodes in 0.10 M PBS (pH=7) for 20 cycles, (B) Typical CVs obtained at  $Fe(CN)_6^{3-}$ /Pim/MWCNTs-modified GC electrodes in 0.10 M PBS (red curve) and Pim/MWCNT-modified GC electrodes in 0.1 M PBS (black curve).

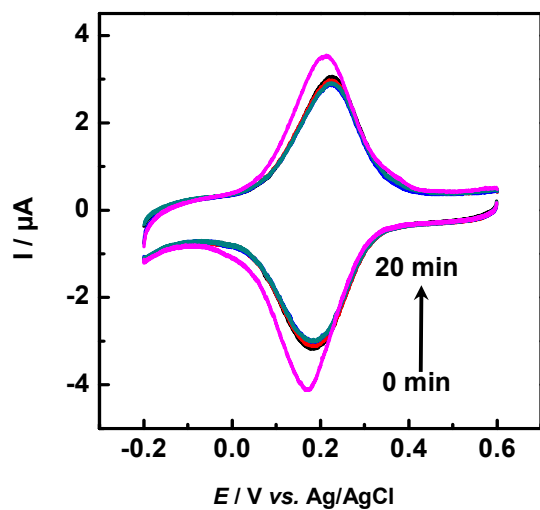

**Figure S5.** CVs obtained at the  $\text{Fe}(\text{CN})_6^{3-}/\text{Pim}/\text{MWCNT}$ -modified GC electrodes in 0.10 M PBS after the electrodes were immersed into 1  $\mu\text{M}$  heparin different times of 0 min (magenta), 5 min (black), 10 min (red), 15 min (blue), and 20 min (dark cyan).

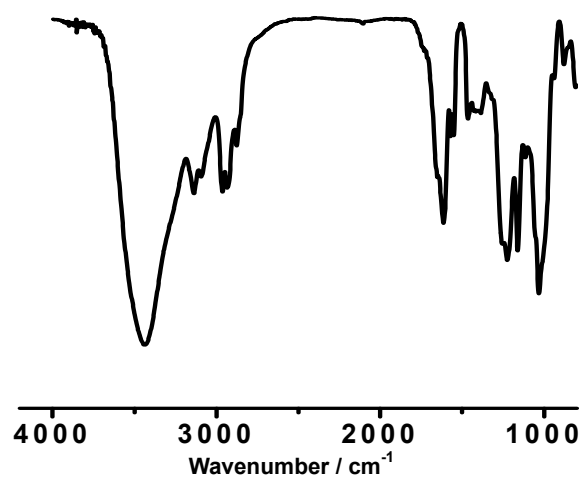

**Figure S6.** FT-IR spectra for the aggregates formed by heparin and Pim, which was exchanged by  $\text{K}_3\text{Fe}(\text{CN})_6$ .
